# Supplementary material
Source: MDPI journal article supplement (https://www.mdpi.com/2073-4352/12/4/534)
Supplement: s1 [file s1]

## Supplementary Information

# An Electrochemical Investigation of Methanol Oxidation on Thin Films of Nickel Oxide and Its Composites with Zirconium and Yttrium Oxides

Karishma Mahmood <sup>1</sup>, Muhammad Adil Mansoor <sup>1,\*</sup>, Mudassir Iqbal <sup>1</sup>, Abul Kalam <sup>2,3</sup>, Javed Iqbal <sup>4</sup>, Asim Jilani <sup>4</sup> and S. Wageh <sup>5,6</sup>

<sup>1</sup> Department of Chemistry, School of Natural Sciences, National University of Sciences and Technology (NUST), Islamabad 44000, Pakistan; karishmafida17@gmail.com (K.M.); mudassir.iqbal@sns.nust.edu.pk (M.I.)

<sup>2</sup> Research Center for Advanced Materials Science (RCAMS), King Khalid University, Abha 61514, Saudi Arabia; abulkalam@kku.edu.sa

<sup>3</sup> Department of Chemistry, Faculty of Science, King Khalid University, Abha 61413, Saudi Arabia

<sup>4</sup> Centre of Nanotechnology, King Abdulaziz University, Jeddah 21589, Saudi Arabia; iqbaljavedch@gmail.com (J.I.); asim.jilane@gmail.com (A.J.)

<sup>5</sup> Department of Physics, Faculty of Science, King Abdulaziz University, Jeddah 21589, Saudi Arabia; wswelm@kau.edu.sa

<sup>6</sup> K. A. CARE Energy Research and Innovation Center, King Abdulaziz University, Jeddah 21589, Saudi Arabia

\* Correspondence: adil.mansoor@sns.nust.edu.pk; Tel.: +92-51-8865601

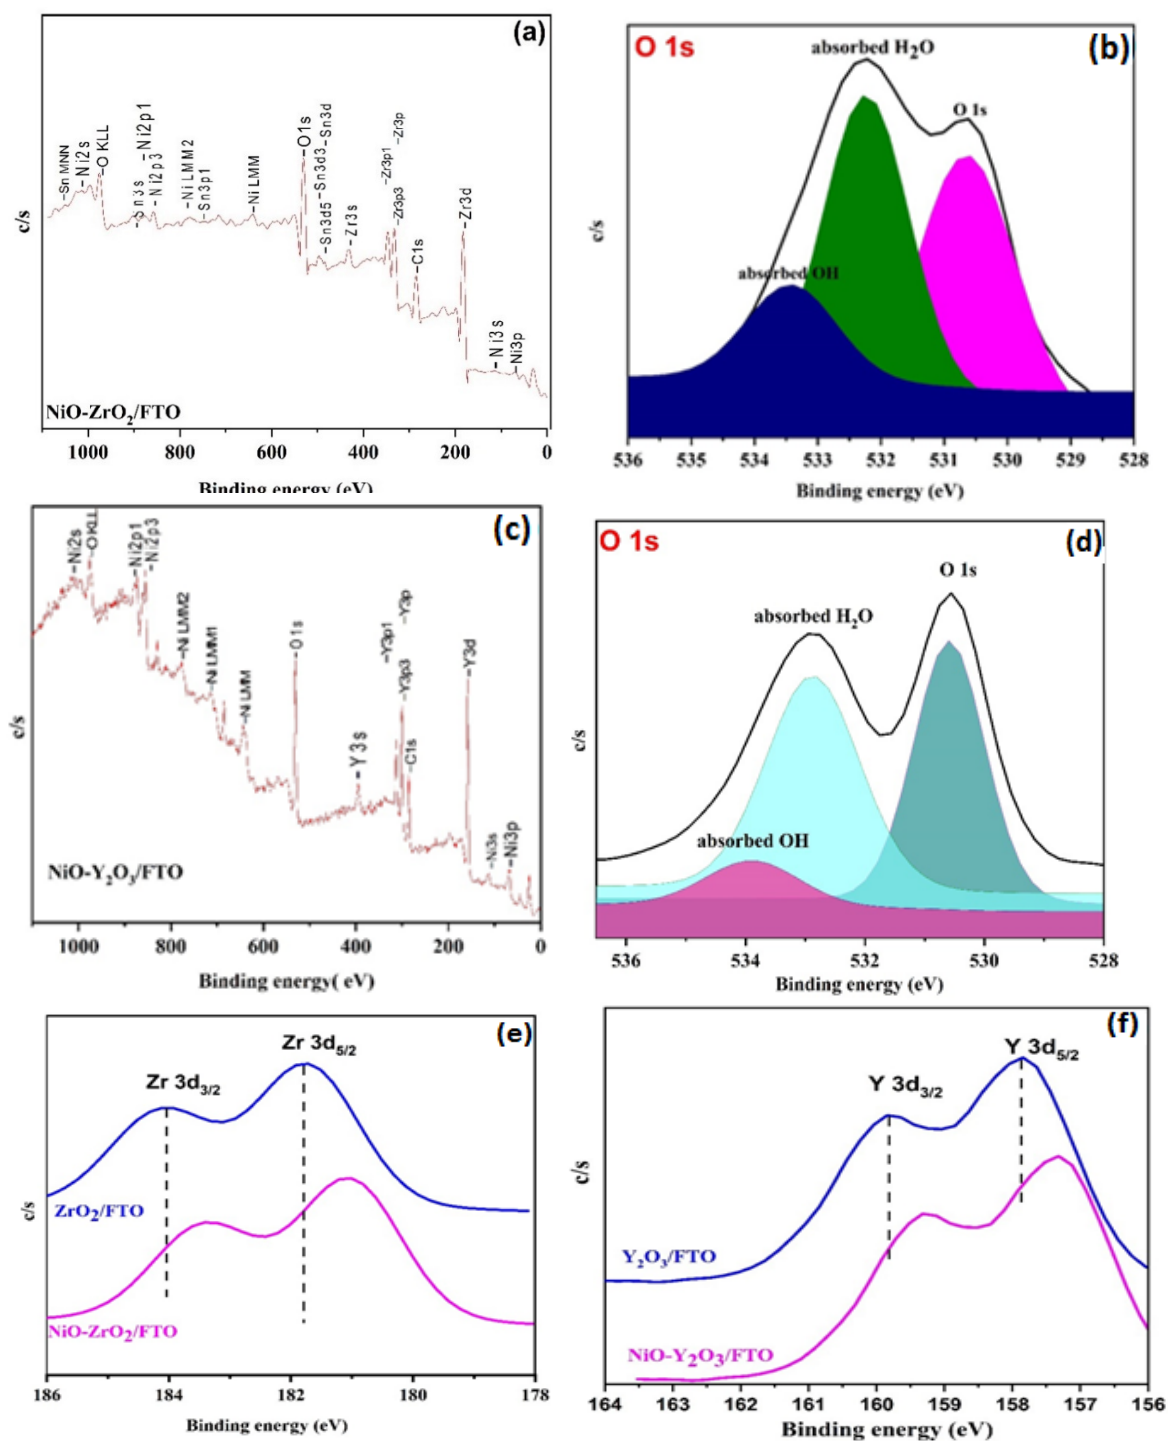

**Figure S1.** (a) XPS survey scan of NiO-ZrO<sub>2</sub>/FTO (b) O1s for NiO-ZrO<sub>2</sub>/FTO (c) XPS survey scan of NiO-Y<sub>2</sub>O<sub>3</sub>/FTO thin film (d) O1s for NiO-Y<sub>2</sub>O<sub>3</sub>/FTO thin film, and (e-f) Zr3d and Y3d scans of pure oxide films with their respective composite thin films.

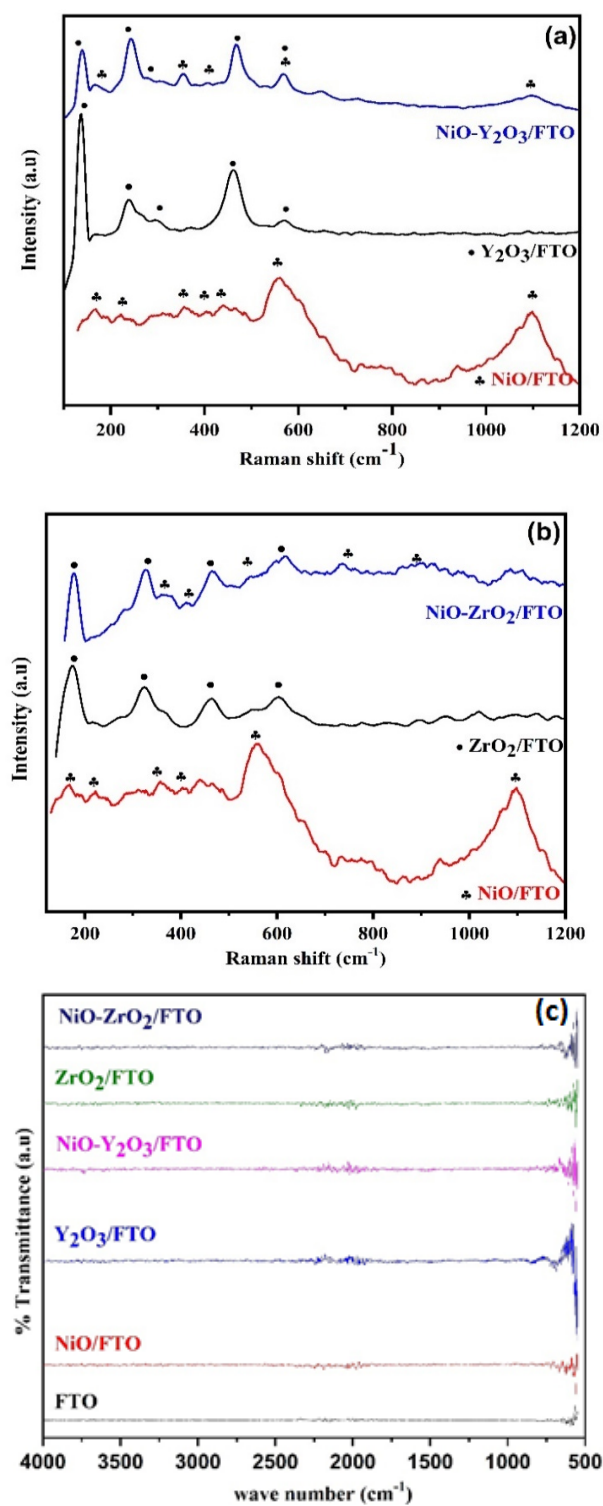

**Figure S2.** Comparison of Raman spectra of (a) NiO- Y<sub>2</sub>O<sub>3</sub>/FTO and (b) NiO-ZrO<sub>2</sub>/FTO with pure NiO/FTO, Y<sub>2</sub>O<sub>3</sub>/FTO, and ZrO<sub>2</sub>/FTO thin films (c) FT-IR spectra of FTO, NiO/FTO, Y<sub>2</sub>O<sub>3</sub>/FTO, ZrO<sub>2</sub>/FTO, NiO-ZrO<sub>2</sub>/FTO, and NiO-Y<sub>2</sub>O<sub>3</sub>/FTO thin films.

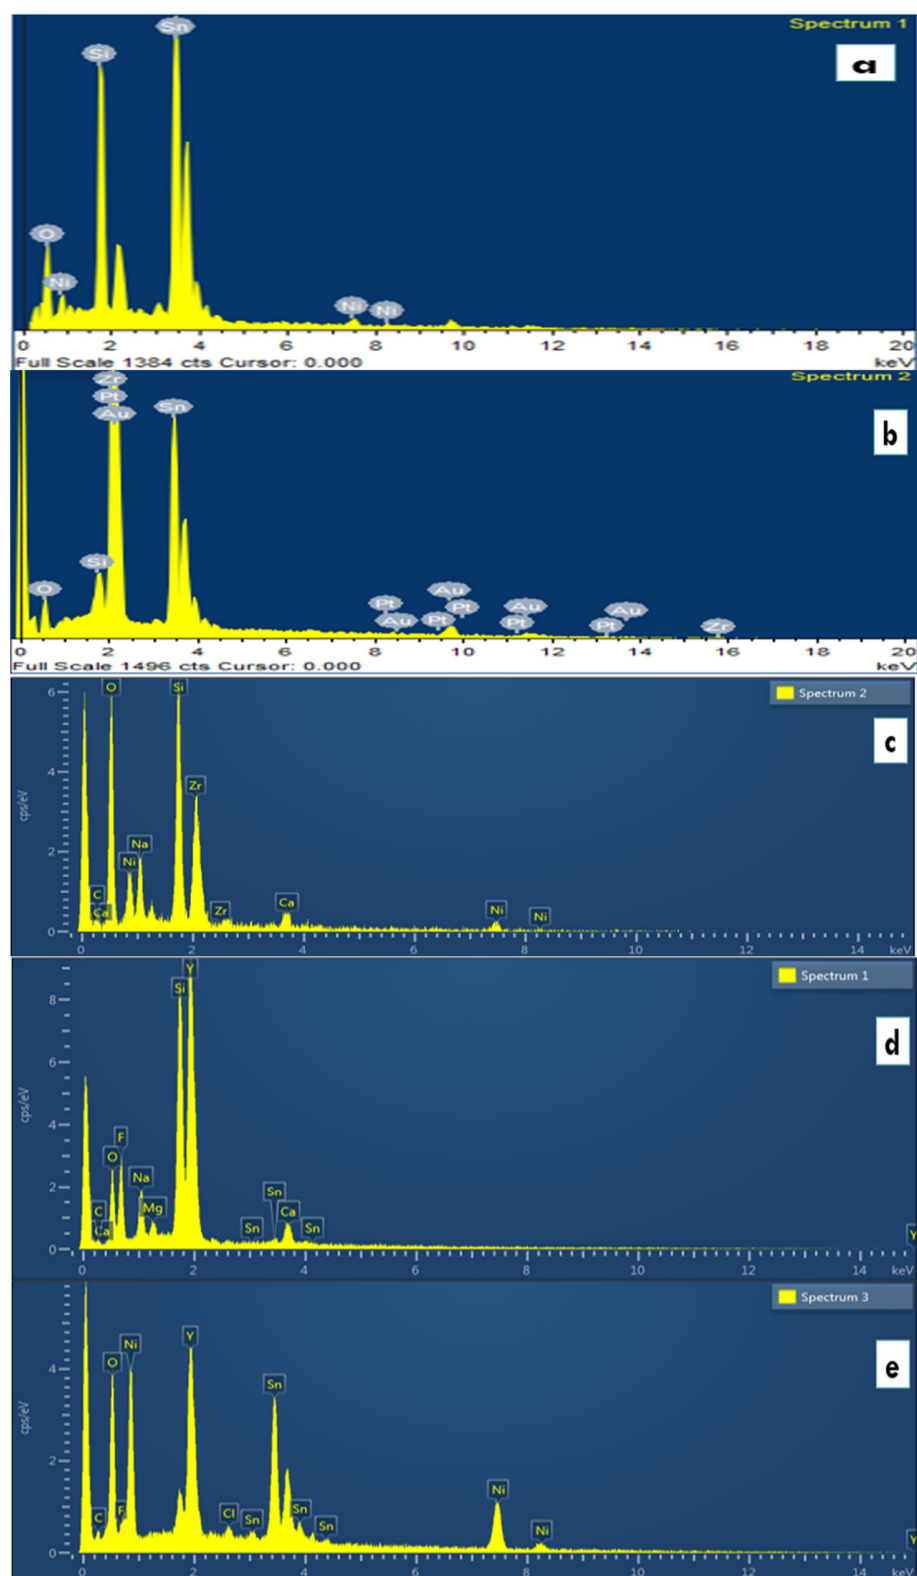

**Figure S3.** EDS spectra of (a) NiO/FTO (b) ZrO<sub>2</sub>/FTO (c) NiO-ZrO<sub>2</sub>/FTO (d) Y<sub>2</sub>O<sub>3</sub>/FTO and (e) NiO-Y<sub>2</sub>O<sub>3</sub>/FTO.

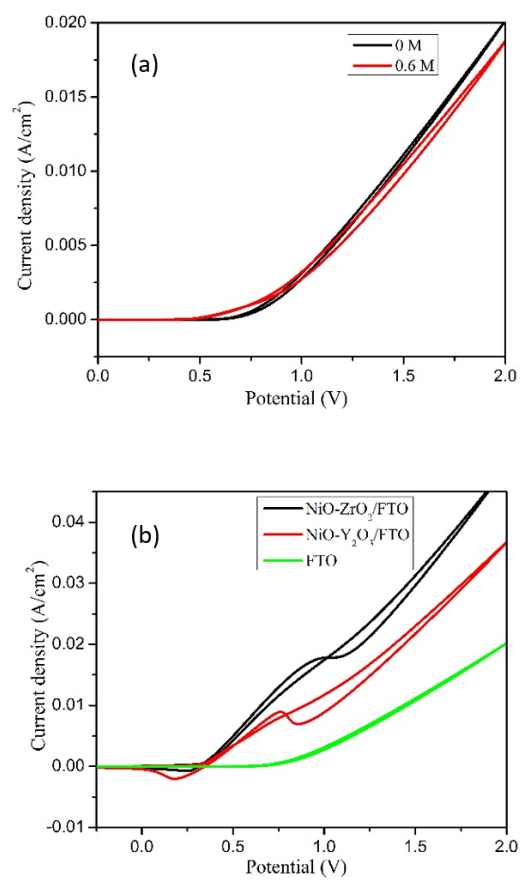

**Figure S4.** Cyclic voltammetry of bare FTO in the presence and absence of methanol (a) and its comparison of methanol oxidation with NiO-ZrO<sub>2</sub>/FTO and NiO-Y<sub>2</sub>O<sub>3</sub>/FTO composite films (b).

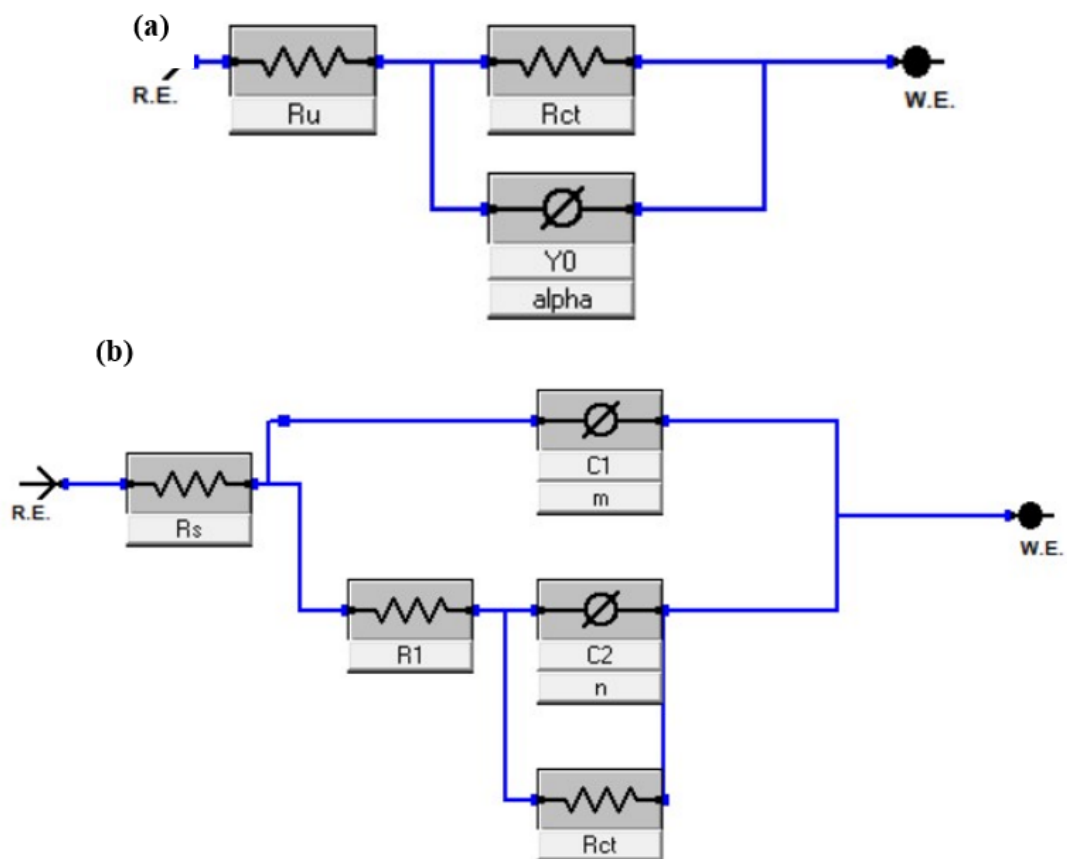

**Figure S5.** Equivalent circuit models obtained from an excellent fit with the experimental data of (a)  $ZrO_2$  and (b)  $NiO$ ,  $NiO-ZrO_2$ ,  $Y_2O_3$ , and  $NiO-Y_2O_3$  films.
